# Supplementary material
Source: publisher site journal article supplement (https://www.dovepress.com/article/590739)
Supplement: Supplementary file 1 [file 590739%20Appendix%201.docx]

**Appendix1. Interview Guide for Clinical Physicians on Research Behavior**

| **Questions** |
| --- |
| 1. What is your perspective on the nature of research and its importance in the field of health? |
| 2. What goals and motivations drive you to conduct research activities? |
| 3. Through what process and strategy do you typically conduct your research? What types of research do you usually engage in? |
| 4. What problems and challenges exist that could hinder you from conducting impactful research? How do you react to these problems, or what solutions do you employ? |
| 5. What facilitators exist within the university that can help improve the quantity and quality of your research? How do you become aware of them, and can you describe how you utilize these opportunities? |
| 6. What steps do you take to improve your research? |
| 7. How do you react if you encounter a problem in your research? |
| 8. What do you do with the results and findings of your research? (Where are they applied?) |
| 9. How are your scientific and research interactions and collaborations with colleagues and peers inside and outside the university? |
| 10. What capabilities do you see in yourself that influence the quality of your research? |
| 11. What actions do you take for your empowerment and personal development in the field of research? |
| 12. Please explain any other research activities you are involved in. |
| 13. Do you have an academic CV (resume)? Are you present on research-oriented social networks? |
| 14. Have you used artificial intelligence or content analysis software in your research? |
| 15. What factors do you consider influential on your research behavior as a clinical faculty member? |
| 16. If you were the Vice Chancellor for Research, what decisions and actions would you take to improve research? |
| 17. Please also explain the application of ethics in clinical research. |
| 18. What type of research activity do you prefer to conduct? |
| 19. Explain the output and benefits of clinical research. Ultimately, what impact can clinical research have? |
